# Supplementary material for: Episodic Future Thinking about Smoking-Related Illness: A Preliminary Investigation of Effects on Delay Discounting, Cigarette Craving, and Cigarette Demand
Source: MDPI journal article supplement (doi:10.3390/ijerph19127136), 2022-06-10
Supplement: s1 [file s1]

**Supplementary Table S1.** *Two-Way Analysis of Covariance of Discounting AUC, Demand Measures, Craving, and Affect by Episodic Future Thinking and Smoking-Related Illness Groups.*

| Variable                            | Source          | <i>df</i> | <i>F</i> | <i>p</i> |
|-------------------------------------|-----------------|-----------|----------|----------|
| Discounting rate (AUC)              | Corrected model | 4         | 3.883    | 0.005    |
|                                     | Intercept       | 1         | 362.729  | 0.000    |
|                                     | Income          | 1         | 0.002    | 0.966    |
|                                     | SRI             | 1         | 6.109    | 0.014    |
|                                     | EFT             | 1         | 8.203    | 0.005    |
|                                     | SRI x EFT       | 1         | 0.940    | 0.333    |
|                                     | Error           | 193       |          |          |
| Cigarette craving (QSU)             | Corrected model | 4         | 3.355    | 0.011    |
|                                     | Intercept       | 1         | 180.097  | 0.000    |
|                                     | Income          | 1         | 0.911    | 0.341    |
|                                     | SRI             | 1         | 5.932    | 0.016    |
|                                     | EFT             | 1         | 5.105    | 0.025    |
|                                     | SRI x EFT       | 1         | 0.228    | 0.633    |
|                                     | Error           | 194       | 3.355    | 0.011    |
| $Q_0$ (Cigarette purchase task)     | Corrected model | 4         | 2.030    | 0.092    |
|                                     | Intercept       | 1         | 185.794  | 0.000    |
|                                     | Income          | 1         | 0.033    | 0.856    |
|                                     | SRI             | 1         | 4.808    | 0.030    |
|                                     | EFT             | 1         | 2.707    | 0.102    |
|                                     | SRI x EFT       | 1         | 0.010    | 0.919    |
|                                     | Error           | 193       | 2.030    | 0.092    |
| $O_{max}$ (Cigarette purchase task) | Corrected model | 4         | 1.624    | 0.170    |
|                                     | Intercept       | 1         | 100.116  | 0.000    |
|                                     | Income          | 1         | 1.733    | 0.190    |
|                                     | SRI             | 1         | 1.731    | 0.190    |
|                                     | EFT             | 1         | 2.082    | 0.151    |
|                                     | SRI x EFT       | 1         | 0.229    | 0.633    |
|                                     | Error           | 193       | 1.624    | 0.170    |
| $P_{max}$ (Cigarette purchase task) | Corrected model | 4         | 0.226    | 0.923    |
|                                     | Intercept       | 1         | 22.689   | 0.000    |
|                                     | Income          | 1         | 0.328    | 0.567    |
|                                     | SRI             | 1         | 0.095    | 0.758    |
|                                     | EFT             | 1         | 0.033    | 0.856    |
|                                     | SRI x EFT       | 1         | 0.378    | 0.540    |

|                |                 |     |        |       |
|----------------|-----------------|-----|--------|-------|
| Affect (PANAS) | Error           | 193 | 0.226  | 0.923 |
|                | Corrected model | 4   | 26.113 | 0.000 |
|                | Intercept       | 1   | 31.631 | 0.000 |
|                | Income          | 1   | 5.289  | 0.023 |
|                | SRI             | 1   | 79.189 | 0.000 |
|                | EFT             | 1   | 3.584  | 0.060 |
|                | SRI x EFT       | 1   | 1.914  | 0.168 |
|                | Error           | 194 | 26.113 | 0.000 |

---

*AUC* Area under the curve; *QSU* Questionnaire on Smoking Urges—Brief; *CPT* Cigarette purchase task; *PANAS* Positive and Negative Affect Scale
